# Supplementary material for: Detrimental effects of heat stress on grain weight and quality in rice (Oryza sativa L.) are aggravated by decreased relative humidity
Source: PeerJ. 2021 Apr 9;9:e11218. doi: 10.7717/peerj.11218 (PMC8040870; doi:10.7717/peerj.11218)
Supplement: Supplemental Information 3 — Raw data of grain weight, head rice rate, and chalkiness in the sheet named ’GW’, ’HR’, and ’CH’, respectively. [file peerj-09-11218-s003.xlsx]

## Sheet: GW
Year	Cultivars	Tem	RH	Days	R1	R2	R3
2017	16343	33	75	8	20.2	20.06	20.38
2017	16343	35	75	8	17.32	17.98	18.4
2017	16343	37	75	8	17.46	17.44	17.18
2017	16343	33	75	15	19.4	19.3	19.24
2017	16343	35	75	15	17.44	17.46	17.52
2017	16343	37	75	15	17.01	17.22	17
2017	16343	33	85	8	20.52	20.62	20.82
2017	16343	35	85	8	18.94	19.04	18.96
2017	16343	37	85	8	18.4	18.3	18.32
2017	16343	33	85	15	19.88	20.26	20
2017	16343	35	85	15	18.96	19	18.92
2017	16343	37	85	15	18.18	18.04	18.42
2017	16343	CK			20.02	20.4	20.04
2017	IR64	33	75	8	22.56	22.44	22.6
2017	IR64	35	75	8	21.58	21.56	21.7
2017	IR64	37	75	8	21.66	21.64	21.68
2017	IR64	33	75	15	23	23.38	22.88
2017	IR64	35	75	15	22.1	22.12	21.94
2017	IR64	37	75	15	21.68	21.06	20.86
2017	IR64	33	85	8	23.7	23.54	23.54
2017	IR64	35	85	8	22.82	23	23
2017	IR64	37	85	8	22.18	22.12	22.08
2017	IR64	33	85	15	23.36	23.26	23.28
2017	IR64	35	85	15	22.26	22.12	21.96
2017	IR64	37	85	15	21.7	21.64	21.72
2017	IR64	CK			23.54	23.6	22.72
2017	LY27	33	75	8	23.8	24.2	24
2017	LY27	35	75	8	23	22.6	22.2
2017	LY27	37	75	8	22.2	23.4	22.8
2017	LY27	33	75	15	23.6	23.6	22.9
2017	LY27	35	75	15	23.4	23.4	23.8
2017	LY27	37	75	15	22.2	22.6	22.2
2017	LY27	33	85	8	27.6	27	28
2017	LY27	35	85	8	26	26	27.2
2017	LY27	37	85	8	23.4	23.6	22.6
2017	LY27	33	85	15	26.2	25.2	25.4
2017	LY27	35	85	15	23.6	23.8	23.2
2017	LY27	37	85	15	23.3333	22.6667	23
2017	LY27	CK			25.6	25.8	26.2
2017	LY6	33	75	8	23.8	24.2	23.4
2017	LY6	35	75	8	22.6	23.2	22.2
2017	LY6	37	75	8	22.8	22.8	23.2
2017	LY6	33	75	15	22.6	22	22.2
2017	LY6	35	75	15	22.2	22	22.4
2017	LY6	37	75	15	22.6	22.2	22
2017	LY6	33	85	8	24.2	24.2	24.8
2017	LY6	35	85	8	24	23.6	23.6
2017	LY6	37	85	8	23.2	23.8	23.6
2017	LY6	33	85	15	23	23.8	23.6
2017	LY6	35	85	15	22.8	22.6	23.4
2017	LY6	37	85	15	22.8	22.4	22.8
2017	LY6	CK			24.8	24.2	24.6
2017	R168	33	75	8	21.18	21.3	21.16
2017	R168	35	75	8	20.72	21.34	21.08
2017	R168	37	75	8	21.46	21.26	21.56
2017	R168	33	75	15	20.44	20.78	21.06
2017	R168	35	75	15	20.78	20.42	20.6
2017	R168	37	75	15	19.78	19.58	19.6
2017	R168	33	85	8	20.92	20.96	20.66
2017	R168	35	85	8	21.84	22	21.62
2017	R168	37	85	8	20.84	21.12	20.8
2017	R168	33	85	15	21.12	21.24	21.4
2017	R168	35	85	15	20.6	20.78	20.9
2017	R168	37	85	15	20.1	20.32	20.5
2017	R168	CK			22	22.16	22.36
2017	ZLY47	33	75	8	25.98	25.52	25.48
2017	ZLY47	35	75	8	23.96	23.9	24
2017	ZLY47	37	75	8	23.88	23.26	23.24
2017	ZLY47	33	75	15	25.24	24.9	24.46
2017	ZLY47	35	75	15	23.54	23.9	23.98
2017	ZLY47	37	75	15	22.4	22.74	22.46
2017	ZLY47	33	85	8	26.08	24.98	25.82
2017	ZLY47	35	85	8	25.1	24.56	22.86
2017	ZLY47	37	85	8	24.48	24.06	24.26
2017	ZLY47	33	85	15	26.62	26.48	26.82
2017	ZLY47	35	85	15	24.32	24.3	24.4
2017	ZLY47	37	85	15	23.32	23.7	23.36
2017	ZLY47	CK			25.84	26.06	26.24

## Sheet: HR
Year	Cultivars	Tem	RH	Days	R1	R2	R3
2017	16343	33	75	8	60.2752	60.8895	60.8747
2017	16343	35	75	8	26.3802	26.0116	28.29
2017	16343	37	75	8	28.642	28.3177	28.0899
2017	16343	33	75	15	61.6606	62.1343
2017	16343	35	75	15	27.6227	26.8649	27.3919
2017	16343	37	75	15	25.0382	24.0088	23.2191
2017	16343	33	85	8	54.1378	57.7105	52.58
2017	16343	35	85	8	37.3444	38.9724	29.3455
2017	16343	37	85	8	32.4088	31.0665	32.7494
2017	16343	33	85	15	61.5603	60.1345	61.1323
2017	16343	35	85	15	31.8182	28.1501	31.1111
2017	16343	37	85	15	29.0323	27.5435	27.2504
2017	16343	CK			57.7873	57.9353	58.1384
2017	IR64	33	75	8	57.1001	57.2275	58.7074
2017	IR64	35	75	8	30.7132	30.2021
2017	IR64	37	75	8	24.7693	25.5
2017	IR64	33	75	15	52.2861	52.6282	54.0469
2017	IR64	35	75	15	34.5496	28.4091
2017	IR64	37	75	15	15.3001	17.4368	16.9451
2017	IR64	33	85	8	59.0726	59.0108
2017	IR64	35	85	8	38.4946	38.3898
2017	IR64	37	85	8	23.8503	26.3626	22.8673
2017	IR64	33	85	15	60.2029	61.6606
2017	IR64	35	85	15	29.8452	31.5789
2017	IR64	37	85	15	21.5003	21.5183
2017	IR64	CK			63.6992	64.1166	63.256
2017	LY27	33	75	8	59.4249	60.4638
2017	LY27	35	75	8	49.7257	49.5387	49.4224
2017	LY27	37	75	8	40.3328	40.3509	41.2143
2017	LY27	33	75	15	56.6745	53.4992
2017	LY27	35	75	15	40.7016	39.9594	39.8643
2017	LY27	37	75	15	38.5697	41.1921	39.9235
2017	LY27	33	85	8	59.6774	59.7571	58.9419
2017	LY27	35	85	8	51.7962	53.3176	52.0275
2017	LY27	37	85	8	41.331	43.273	42.5248
2017	LY27	33	85	15	58.9354	59.4373	58.9565
2017	LY27	35	85	15	51.1441	52.4973	53.116
2017	LY27	37	85	15	32.7603	34.1046	34.4523
2017	LY27	CK			62.1516	61.2022	60.1487
2017	LY6	33	75	8	54.7441	51.1592	51.9814
2017	LY6	35	75	8	39.7529	40.9929	40.1891
2017	LY6	37	75	8	28.6123	26.1812	27.2549
2017	LY6	33	75	15	50.6024	53.6822	51.3758
2017	LY6	35	75	15	37.3759	38.9864	39.2579
2017	LY6	37	75	15	20.2675	19.2874	20.1095
2017	LY6	33	85	8	58.9129	58.2945	60.5331
2017	LY6	35	85	8	51.1753	50.6646	50.9619
2017	LY6	37	85	8	34.9206	31.3964	31.8764
2017	LY6	33	85	15	57.1861	56.0117	58.0834
2017	LY6	35	85	15	46.9587	50.6404	50.3807
2017	LY6	37	85	15	33.112	33.6751	33.3704
2017	LY6	CK			61.5863	63.004	61.6596
2017	R168	33	75	8	58.8731	59.8361	59.6783
2017	R168	35	75	8	53.5419	52.0996	54.3627
2017	R168	37	75	8	44.487	46.5376	47.2136
2017	R168	33	75	15	56.3555	56.1436	55.0027
2017	R168	35	75	15	51.9556	53.0906	51.5644
2017	R168	37	75	15	39.9624	38.9065	40.7991
2017	R168	33	85	8	57.2483	58.0256	57.8833
2017	R168	35	85	8	59.1653	61.4973	58.8285
2017	R168	37	85	8	49.5941	50.6831	47.1753
2017	R168	33	85	15	55.4386	55.5341	53.2578
2017	R168	35	85	15	53.4841	55.7903	54.0119
2017	R168	37	85	15	47.1627	46.4364	48.4452
2017	R168	CK			57.0853	57.091	58.6904
2017	ZLY47	33	75	8	48.0623	45.707	48.1028
2017	ZLY47	35	75	8	30.1125	33.2676	29.8589
2017	ZLY47	37	75	8	31.4607	31.0886	29.204
2017	ZLY47	33	75	15	43.8061	47.045	47.0981
2017	ZLY47	35	75	15	29.8773	27.7725	25.6105
2017	ZLY47	37	75	15	26.3191	28.1903	23.8043
2017	ZLY47	33	85	8	52.0375	57.0794
2017	ZLY47	35	85	8	46.821	48.5099	45.5659
2017	ZLY47	37	85	8	30.4871	27.2304	30.5189
2017	ZLY47	33	85	15	55.8856	57.4547	54.3222
2017	ZLY47	35	85	15	40.6068	39.6682	42.9478
2017	ZLY47	37	85	15	25.7382	25.5259	28.0507
2017	ZLY47	CK			59.8016	60.0667	59.3964

## Sheet: CH
Year	Cultivars	Tem	RH	Days	R1	R2	R3
2017	16343	33	85	8	25.8	21.1	20
2017	16343	35	85	8	36.4	31.4	28.9
2017	16343	37	85	8	42.9	40.4
2017	16343	33	75	8	24	22.9	25.5
2017	16343	35	75	8	48.1	57.7	49.4
2017	16343	37	75	8	71.4	71	75.5
2017	16343	33	75	15	34.8	35.7
2017	16343	35	75	15	66.4	63.8	65.8
2017	16343	37	75	15	75.6	77.5	78.5
2017	16343	33	85	15	25.6	23.3	21.1
2017	16343	35	85	15	59.7	56.6	55.9
2017	16343	37	85	15	82.1	79.9	81
2017	16343	CK			13.6	12.4
2017	IR64	33	75	8	8.4	9.4	9.3
2017	IR64	35	75	8	24.3	24.5	28.9
2017	IR64	37	75	8	33.6	37.4
2017	IR64	33	85	8	6.2	6.1
2017	IR64	35	85	8	23	19.1
2017	IR64	37	85	8	32.6	28.7
2017	IR64	33	75	15	10.3	11.4	10.7
2017	IR64	35	75	15	37.8	42.5
2017	IR64	37	75	15	37.3	46.4
2017	IR64	33	85	15	8.3	9.1	10.1
2017	IR64	35	85	15	25	26.9	27
2017	IR64	37	85	15	48.7	55.5
2017	IR64	CK			3.8	4.7
2017	LY27	33	75	8	20.7	18
2017	LY27	35	75	8	35.7	37.3	35.2
2017	LY27	37	75	8	51.9	50.5	49.2
2017	LY27	33	85	8	25.8	27.6	24.3
2017	LY27	35	85	8	29.6	28.9	25.3
2017	LY27	37	85	8	40.1	48.3	44.1
2017	LY27	33	75	15	33	34.6
2017	LY27	35	75	15	44.2	44.6	44.3
2017	LY27	37	75	15	49.8	51.9	52.3
2017	LY27	33	85	15	26.9	27.4	25.8
2017	LY27	35	85	15		24.9	24.4
2017	LY27	37	85	15	58.6	55.3	56.4
2017	LY27	CK			11.7	11.2	11.9
2017	LY6	33	75	8	30.8	35.8	34.4
2017	LY6	35	75	8	46.9	44.8	44.2
2017	LY6	37	75	8	50.5	53.6	54.9
2017	LY6	33	85	8	23.9	25.2	26.9
2017	LY6	35	85	8	33.4	29	31.9
2017	LY6	37	85	8	45.8	50.2	49.5
2017	LY6	33	75	15	43.9	43.9	45.3
2017	LY6	35	75	15	51.6	48.5	47.9
2017	LY6	37	75	15	63.1	59.6	60.5
2017	LY6	33	85	15	27.7	29.5	27.2
2017	LY6	35	85	15	36.2	32	22.8
2017	LY6	37	85	15	48.2	49	51.5
2017	LY6	CK			9.6	14.2	10.8
2017	R168	33	75	8	6.6	8.4	8.1
2017	R168	35	75	8	14.7	15	14
2017	R168	37	75	8	27.9	31	31.1
2017	R168	33	85	8	9.7	11.2	7.7
2017	R168	35	85	8	9.5	7.6	10.1
2017	R168	37	85	8	26.8	23.5	23.4
2017	R168	33	75	15	13.9	14.1	14.4
2017	R168	35	75	15	9.8	14.7	10
2017	R168	37	75	15	27.7	34.2	22.6
2017	R168	33	85	15	11.9	13	11.7
2017	R168	35	85	15	12.3	12.6	10.4
2017	R168	37	85	15	23.6	21.7	23.3
2017	R168	CK			4.5	4.7	4.5
2017	ZLY47	33	75	8	43.1	42.5	46.7
2017	ZLY47	35	75	8	41.5	42.3	42.8
2017	ZLY47	37	75	8	45.5	43.3	41.4
2017	ZLY47	33	85	8	35.9	37.5
2017	ZLY47	35	85	8	41.1	41.6	41.3
2017	ZLY47	37	85	8	49.6	57.5	49.8
2017	ZLY47	33	75	15	54.5	51.5	51.6
2017	ZLY47	35	75	15	53.2	51.2	54.1
2017	ZLY47	37	75	15	55.5	47.8	48.9
2017	ZLY47	33	85	15	38.1	37.9	39.4
2017	ZLY47	35	85	15	45.3	46.1	46.1
2017	ZLY47	37	85	15	51.2	55.2	51.6
2017	ZLY47	CK			18.9	19.7	19.7
